# Supplementary material for: Spatial Inequality in Potential Employment Supply and Actual Employment Access Under Differentiated Housing Costs: A Case Study of Urumqi
Source: Research Square preprint supplement (doi:10.21203/rs.3.rs-7083416/v1), 2025-10-06

**1. Comparative Experimental Results**

Since only the number of employment opportunities and average wages involve job-matching weights, we compare the results of four indicators before and after incorporating these weights: potential employment opportunity quantity, potential employment average wage, actual employment opportunity quantity accessed by residents, and actual employment average wage. The comparative results based on the main model are as follows:

|  | | Correspond variables | R² | MAE | RMSE |
| --- | --- | --- | --- | --- | --- |
| With job-matching weights | potential employment opportunities | | 0.981 | 0.080 | 0.137 |
| potential employment average salary | | 0.967 | 0.094 | 0.181 |
| actual employment opportunities | | 0.726 | 0.365 | 0.524 |
| actual employment average salary | | 0.820 | 0.315 | 0.419 |
| Without job-matching weights | potential employment opportunities | | 0.938 | 0.157 | 0.248 |
| potential employment average salary | | 0.537 | 0.341 | 0.683 |
| actual employment opportunities | | 0.660 | 0.427 | 0.604 |
| actual employment average salary | | 0.801 | 0.310 | 0.435 |

**2. Variable Design and Description**

| Variable Type | Variable Name | Description |
| --- | --- | --- |
| Target Variable | potential employment opportunities | Number of employment opportunities within 1 km of the residence |
| potential employment average salary | Average salary of employment opportunities within 1 km of the residence |
| potential employment accessibility | Distance from residence to city hall (as a proxy for central accessibility) |
| actual employment opportunities | Number of employment opportunities at the grid where the resident actually works |
| actual employment average salary | Average salary at the grid where the resident actually works |
| actual commute time | Average commuting time from residence to workplace |
| Key Variable | rent | Average housing rent in the residential area |
| Locational Features | distance to mall | Distance from residence to the nearest shopping mall |
| distance to school | Distance from residence to the nearest educational facility |
| distance to industrial park | Distance from residence to the nearest industrial park |
| distance to healthcare facility | Distance from residence to the nearest healthcare facility |
| distance to transit station | Distance from residence to the nearest public transit station |
| Environmental Features | home-work balance | Ratio of employed to residential population within the grid |
| housing year | Construction year of the residential area |
| floor ratio | Floor area ratio of the residential area |
| green ratio | Green coverage ratio of the residential area |
| Individual Features | mobile cost | Average monthly mobile communication expense of employed residents in the grid |
| ride app time | Average usage time of ride-hailing apps among employed residents in the grid |
| finance app time | Average usage time of financial apps among employed residents in the grid |
| discount app time | Average usage time of group-buying/discount apps among employed residents in the grid |
| education app time | Average usage time of educational apps among employed residents in the grid |
| job app time | Average usage time of job-search apps among employed residents in the grid |
| male to female ratio | Ratio of male to female employed population within the grid |
| age | Average age of employed residents within the grid |
| local | Proportion of locally registered employed residents within the grid |
| work time | Average working hours of employed residents within the grid |
| Industrial Structure Features | top industry actual employment | Dominant industry by employment share in the actual workplace grid |
| top industry potential employment | Dominant industry by employment share in the residential grid |
| Transportation Features | commuting outflow | Number of residents commuting out of this grid to work elsewhere |
| commuting inflow | Number of workers commuting into this grid from other residential areas |
| employment congestion morning | Total number of people present in the workplace grid during morning peak (9-10 a.m.) |
| employment congestion evening | Total number of people present in the workplace grid during evening peak (7-8 p.m.) |
| home congestion morning | Total number of people present in the residential grid during morning peak (9–10 a.m.) |
| home congestion evening | Total number of people present in the residential grid during evening peak (7–8 p.m.) |

**3.Performance comparison of SVM, XGBoost, and CatBoost models**

| Correspond variables | Models | R² | MAE | RMSE |
| --- | --- | --- | --- | --- |
| potential employment opportunities | SVM | 0.928 | 0.175 | 0.266 |
|  | XGBoost | 0.941 | 0.167 | 0.241 |
|  | **CatBoost** | **0.981** | **0.080** | **0.137** |
| potential employment average salary | SVM | 0.756 | 0.285 | 0.487 |
|  | XGBoost | 0.934 | 0.160 | 0.255 |
|  | **CatBoost** | **0.967** | **0.094** | **0.181** |
| potential employment accessibility | SVM | 0.812 | 0.080 | 0.489 |
|  | **XGBoost** | **0.966** | 0.044 | **0.207** |
|  | CatBoost | 0.964 | **0.034** | 0.215 |
| actual employment opportunities | SVM | 0.554 | 0.452 | 0.669 |
|  | XGBoost | 0.708 | 0.380 | 0.541 |
|  | **CatBoost** | **0.726** | **0.365** | **0.524** |
| actual employment average salary | SVM | 0.609 | 0.472 | 0.617 |
|  | XGBoost | 0.819 | 0.316 | 0.419 |
|  | **CatBoost** | **0.820** | **0.315** | **0.419** |
| actual commute time | SVM | 0.403 | 0.216 | 0.278 |
|  | XGBoost | 0.463 | 0.207 | 0.264 |
|  | **CatBoost** | **0.474** | **0.205** | **0.261** |

**4. Local Dependence Plots (for features other than housing rent)**

（1）Target variable：potential employment opportunities


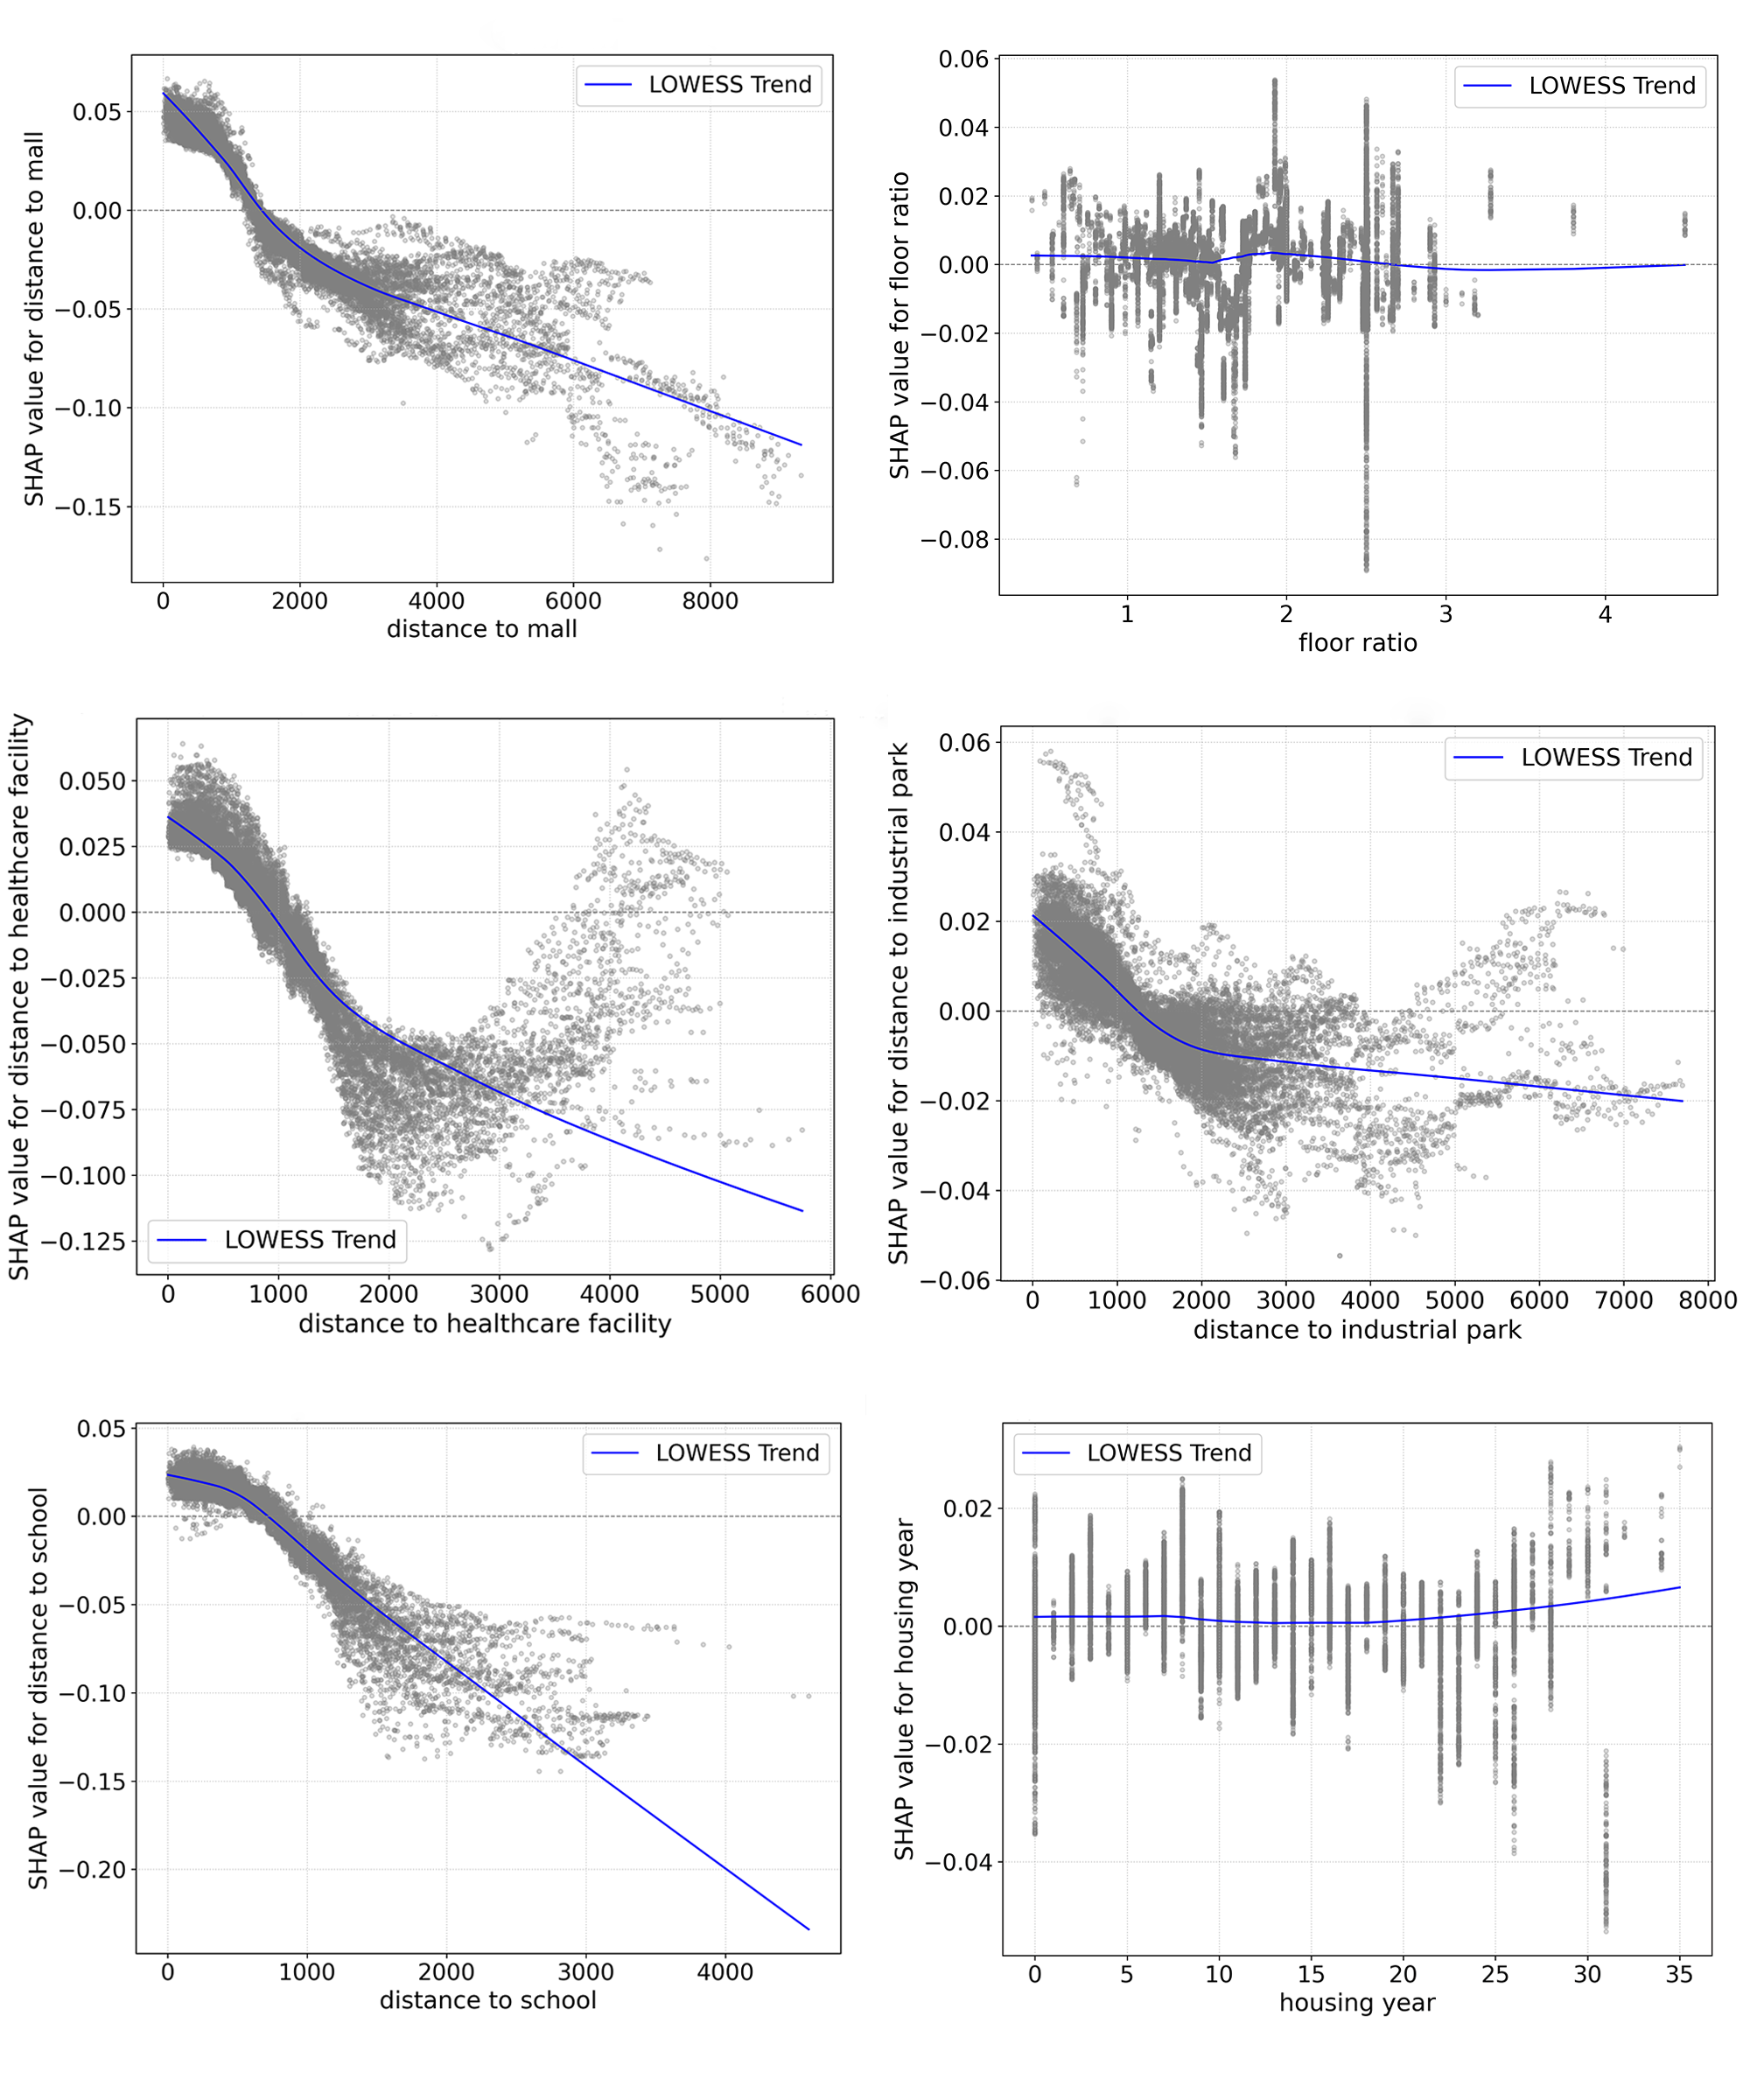


（2）Target variable：potential employment average salary


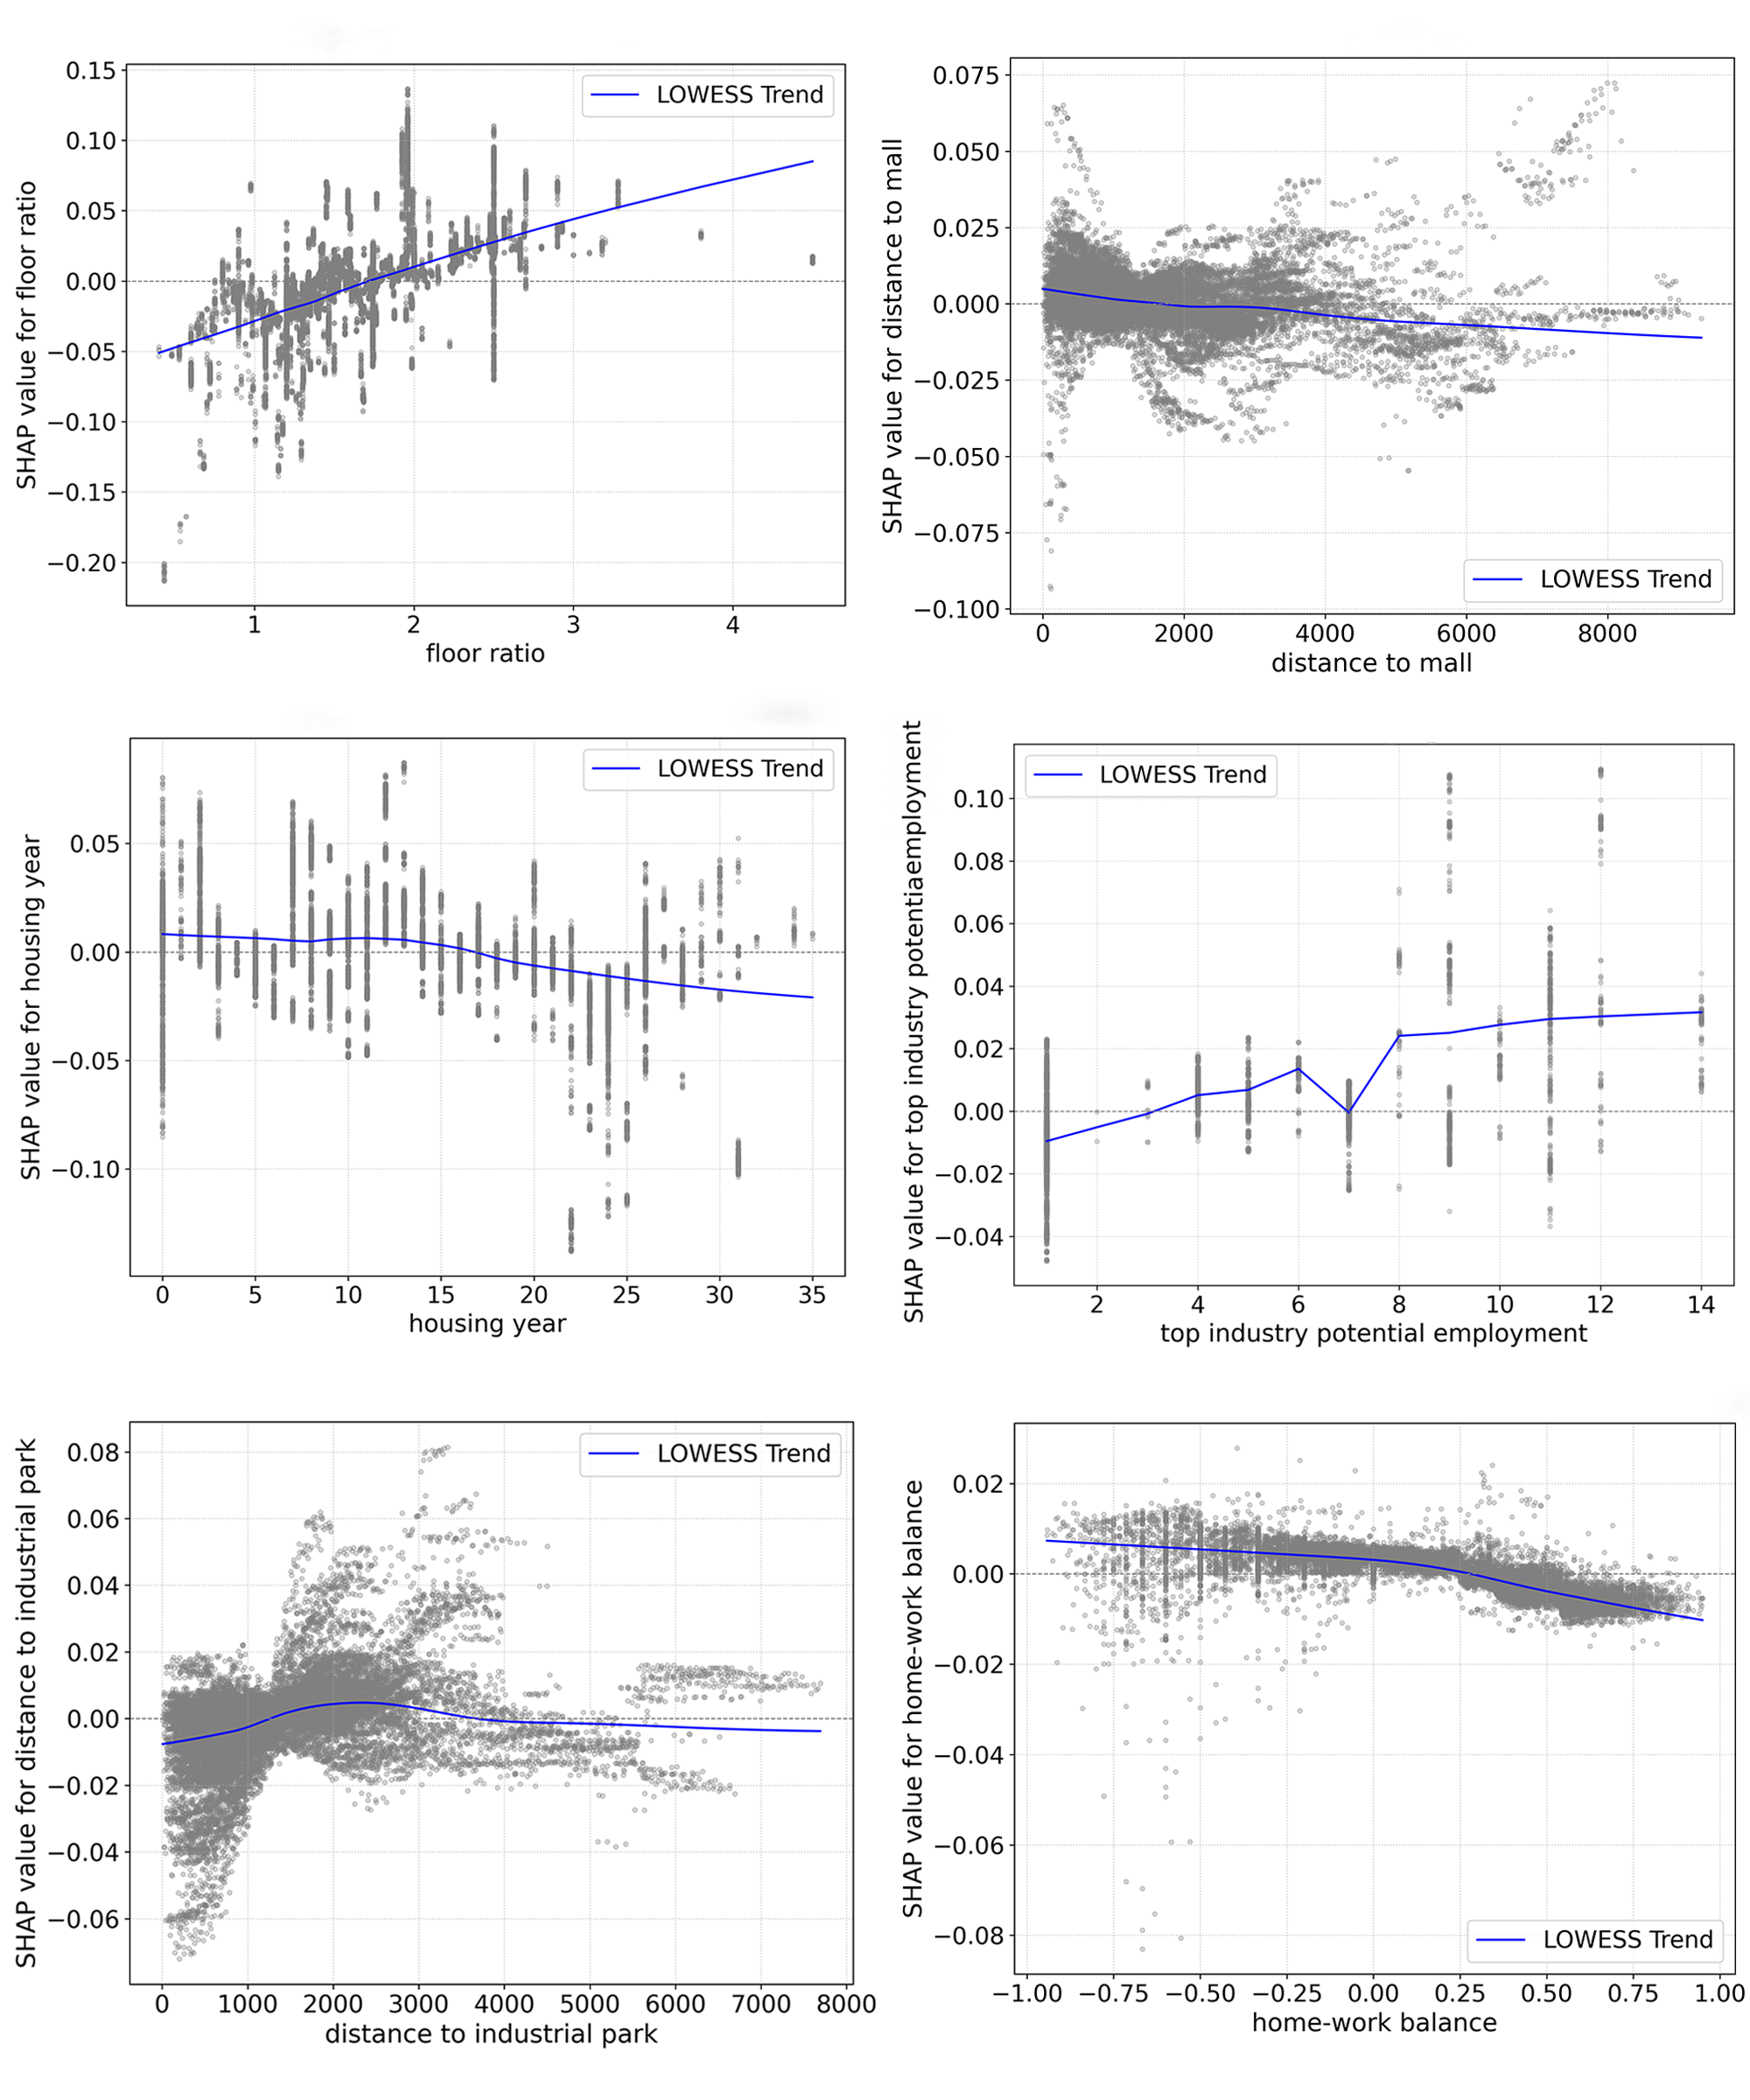


（3）Target variable: potential employment accessibility


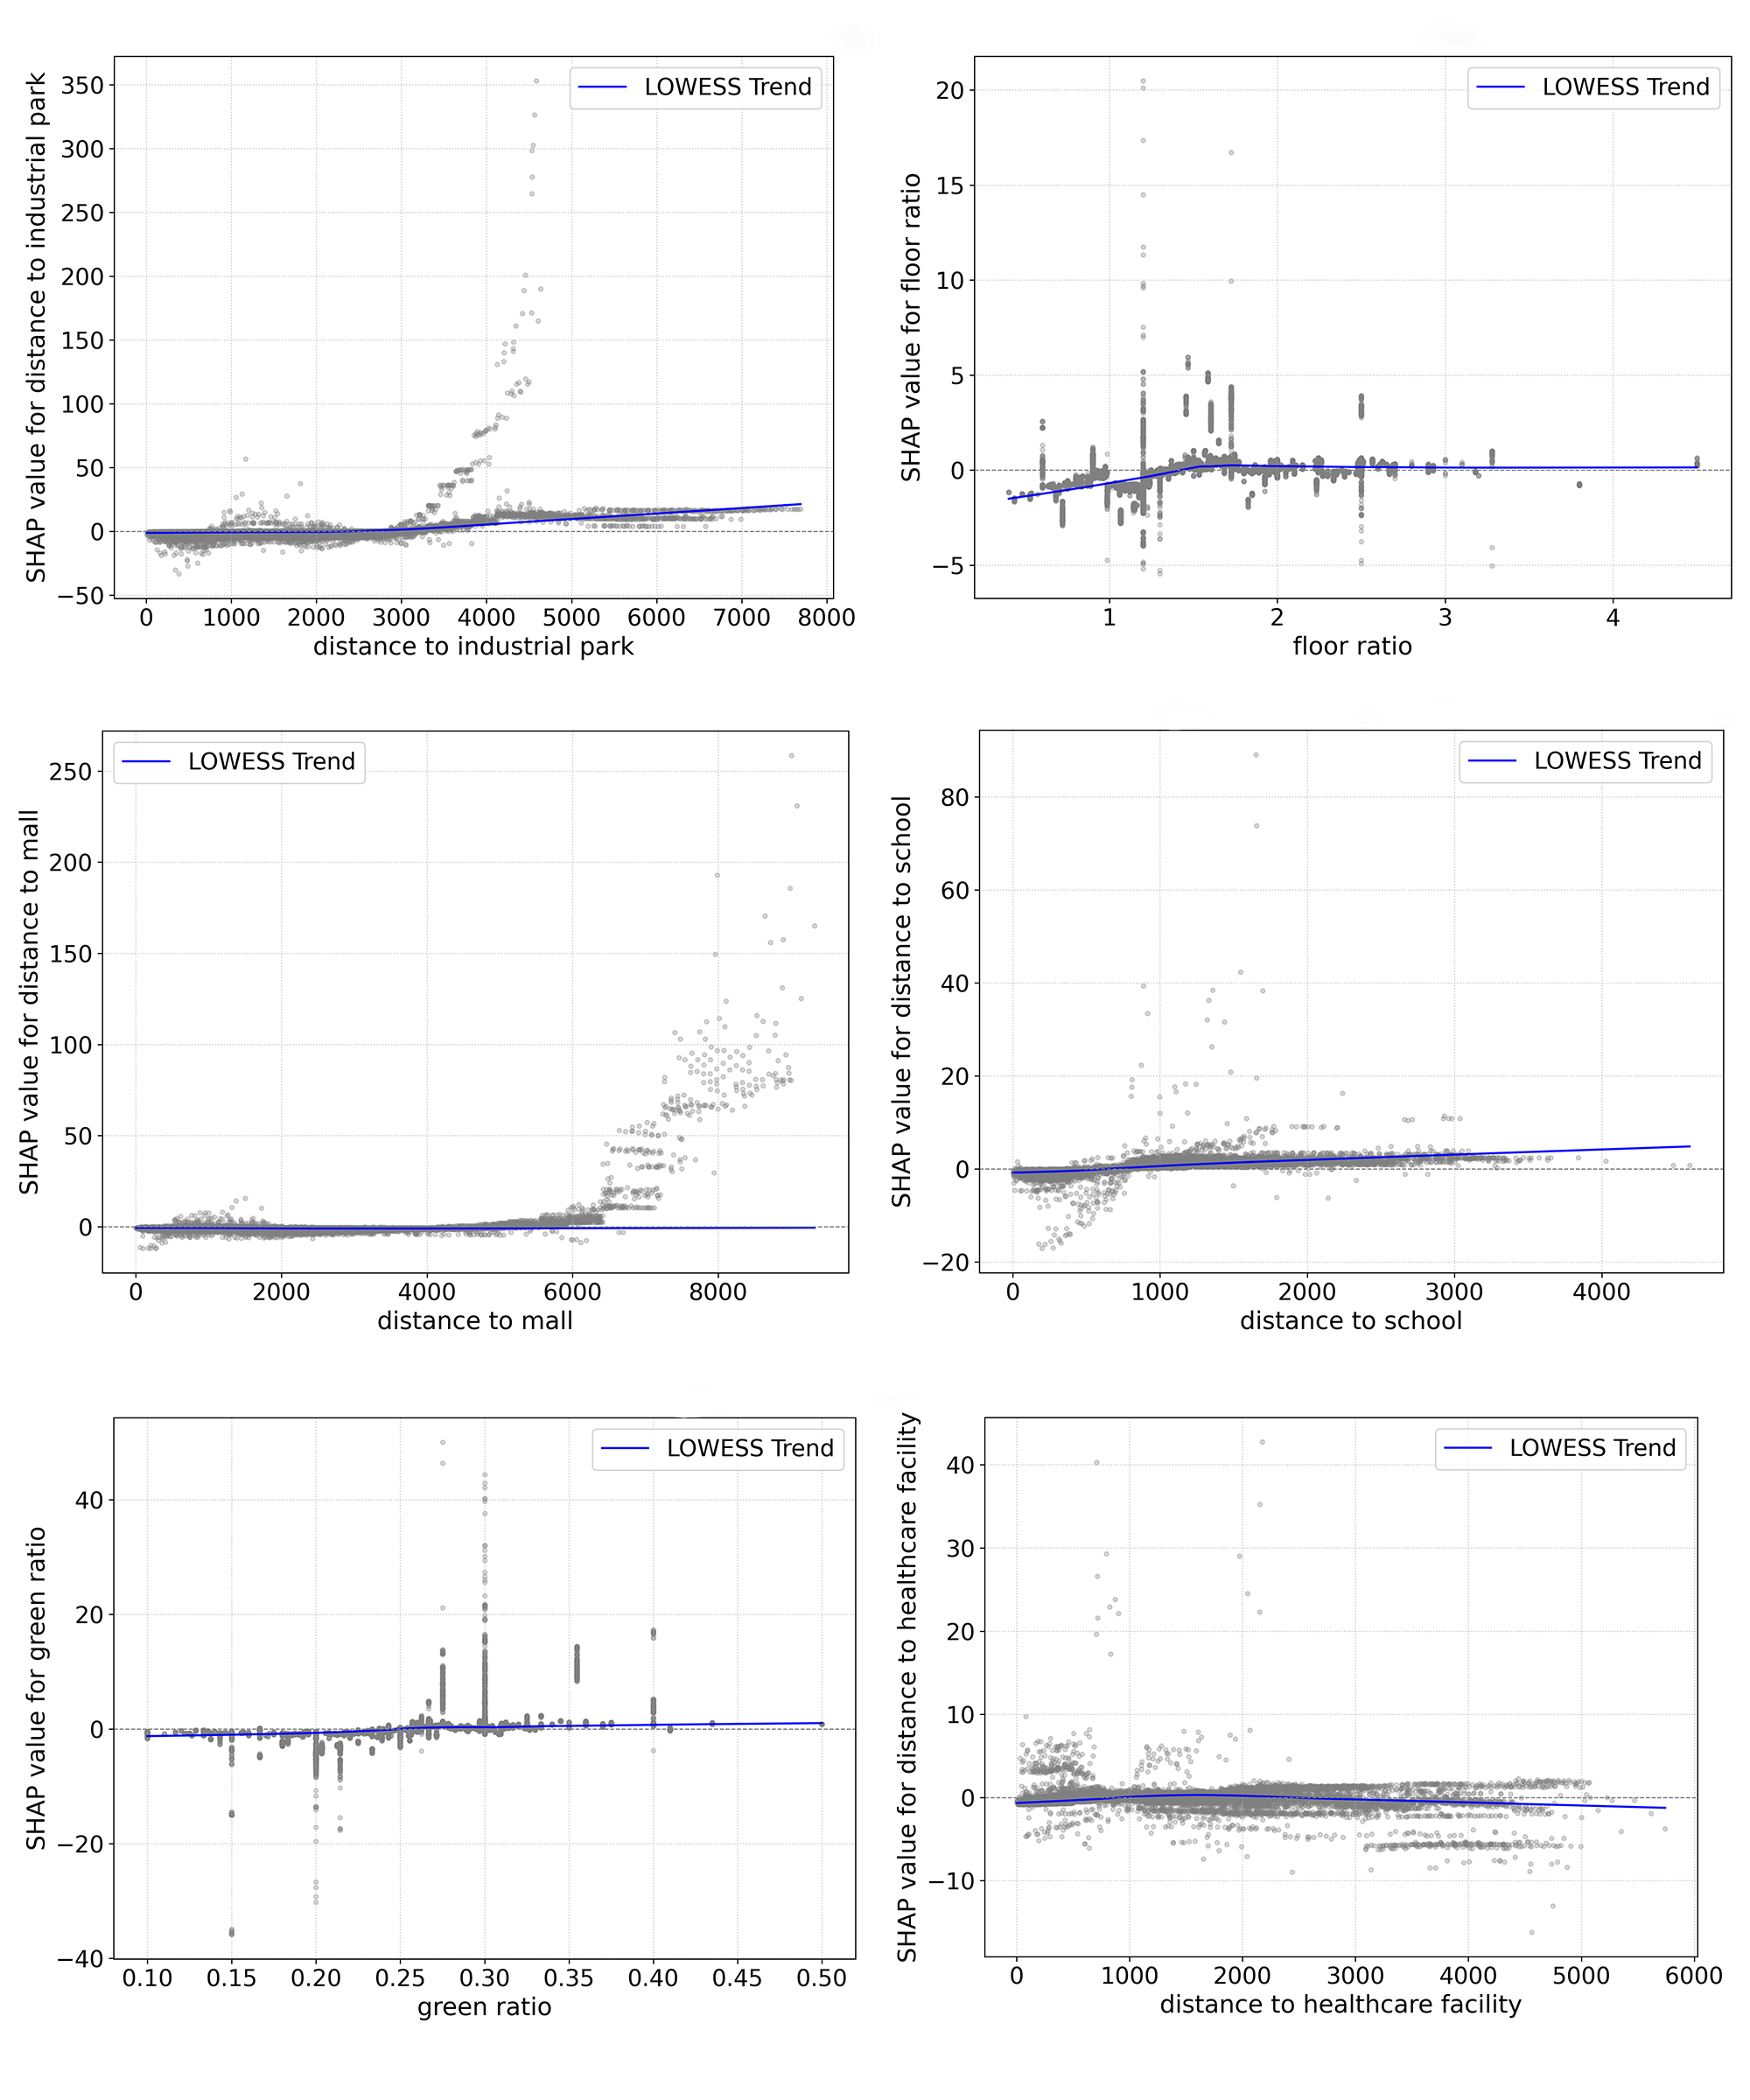


（4）Target variable: actual employment opportunities


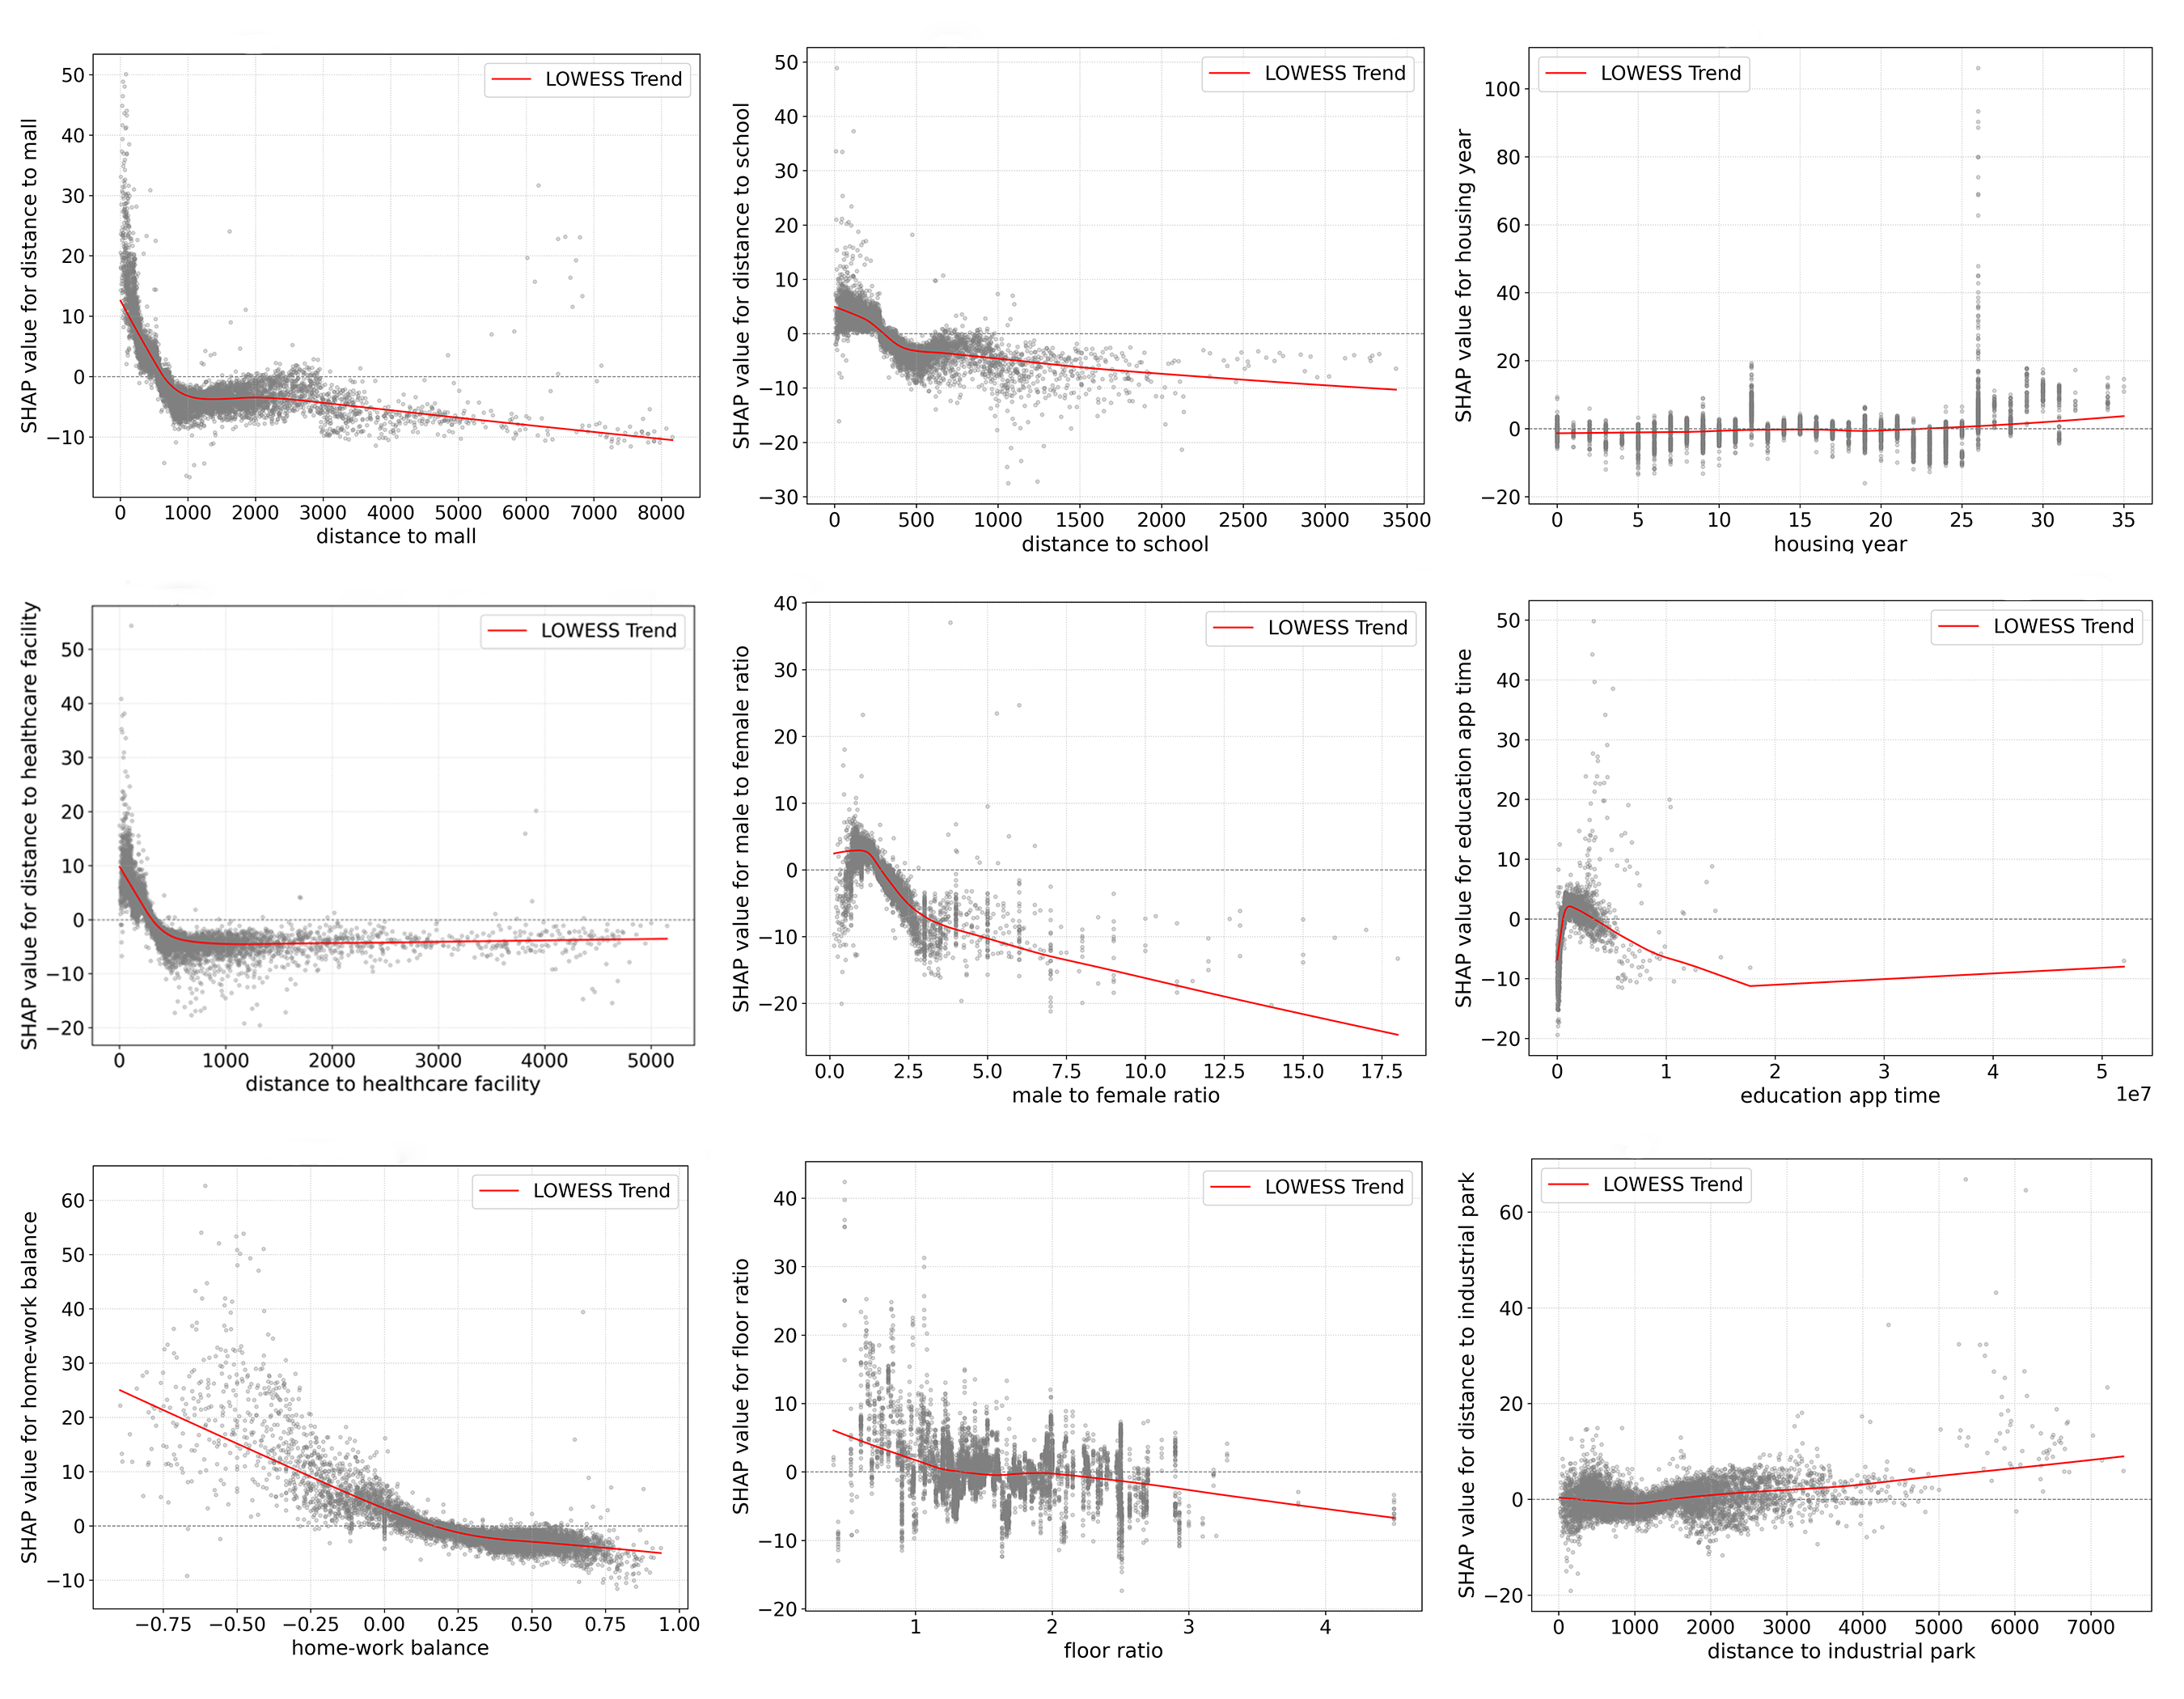


（5）Target variable: actual employment average salary


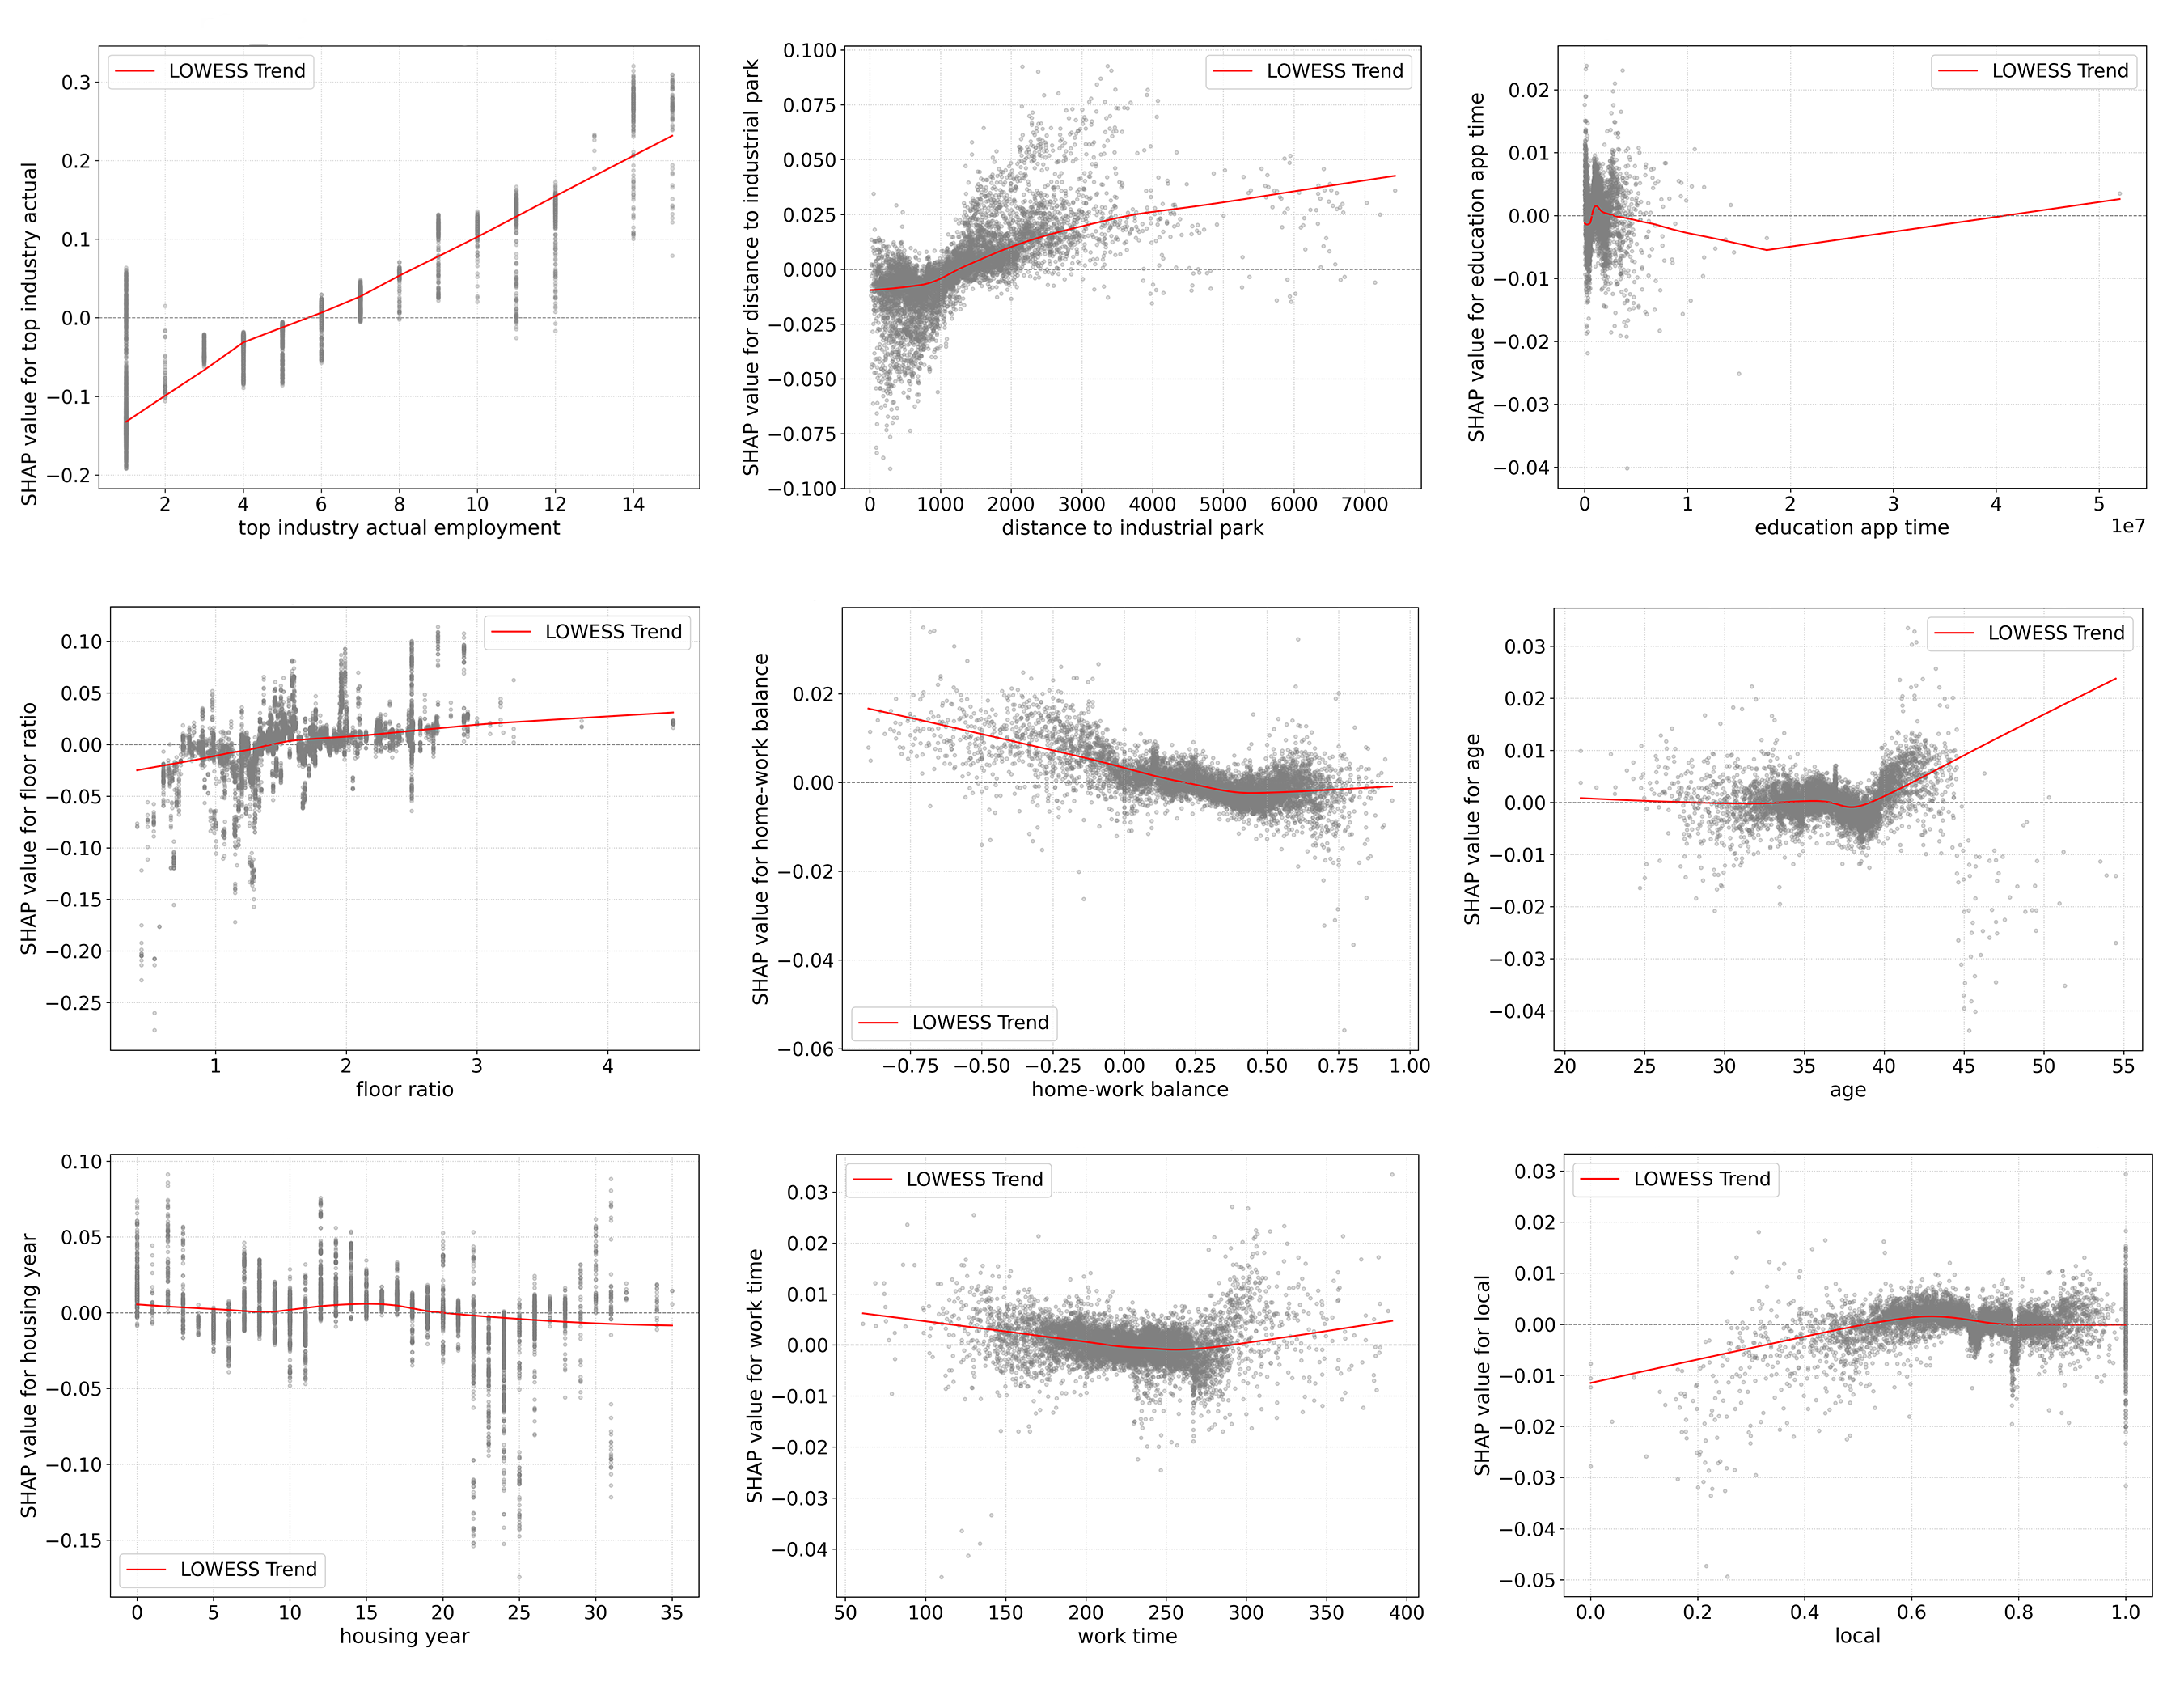


（6）Target variable: actual commute time


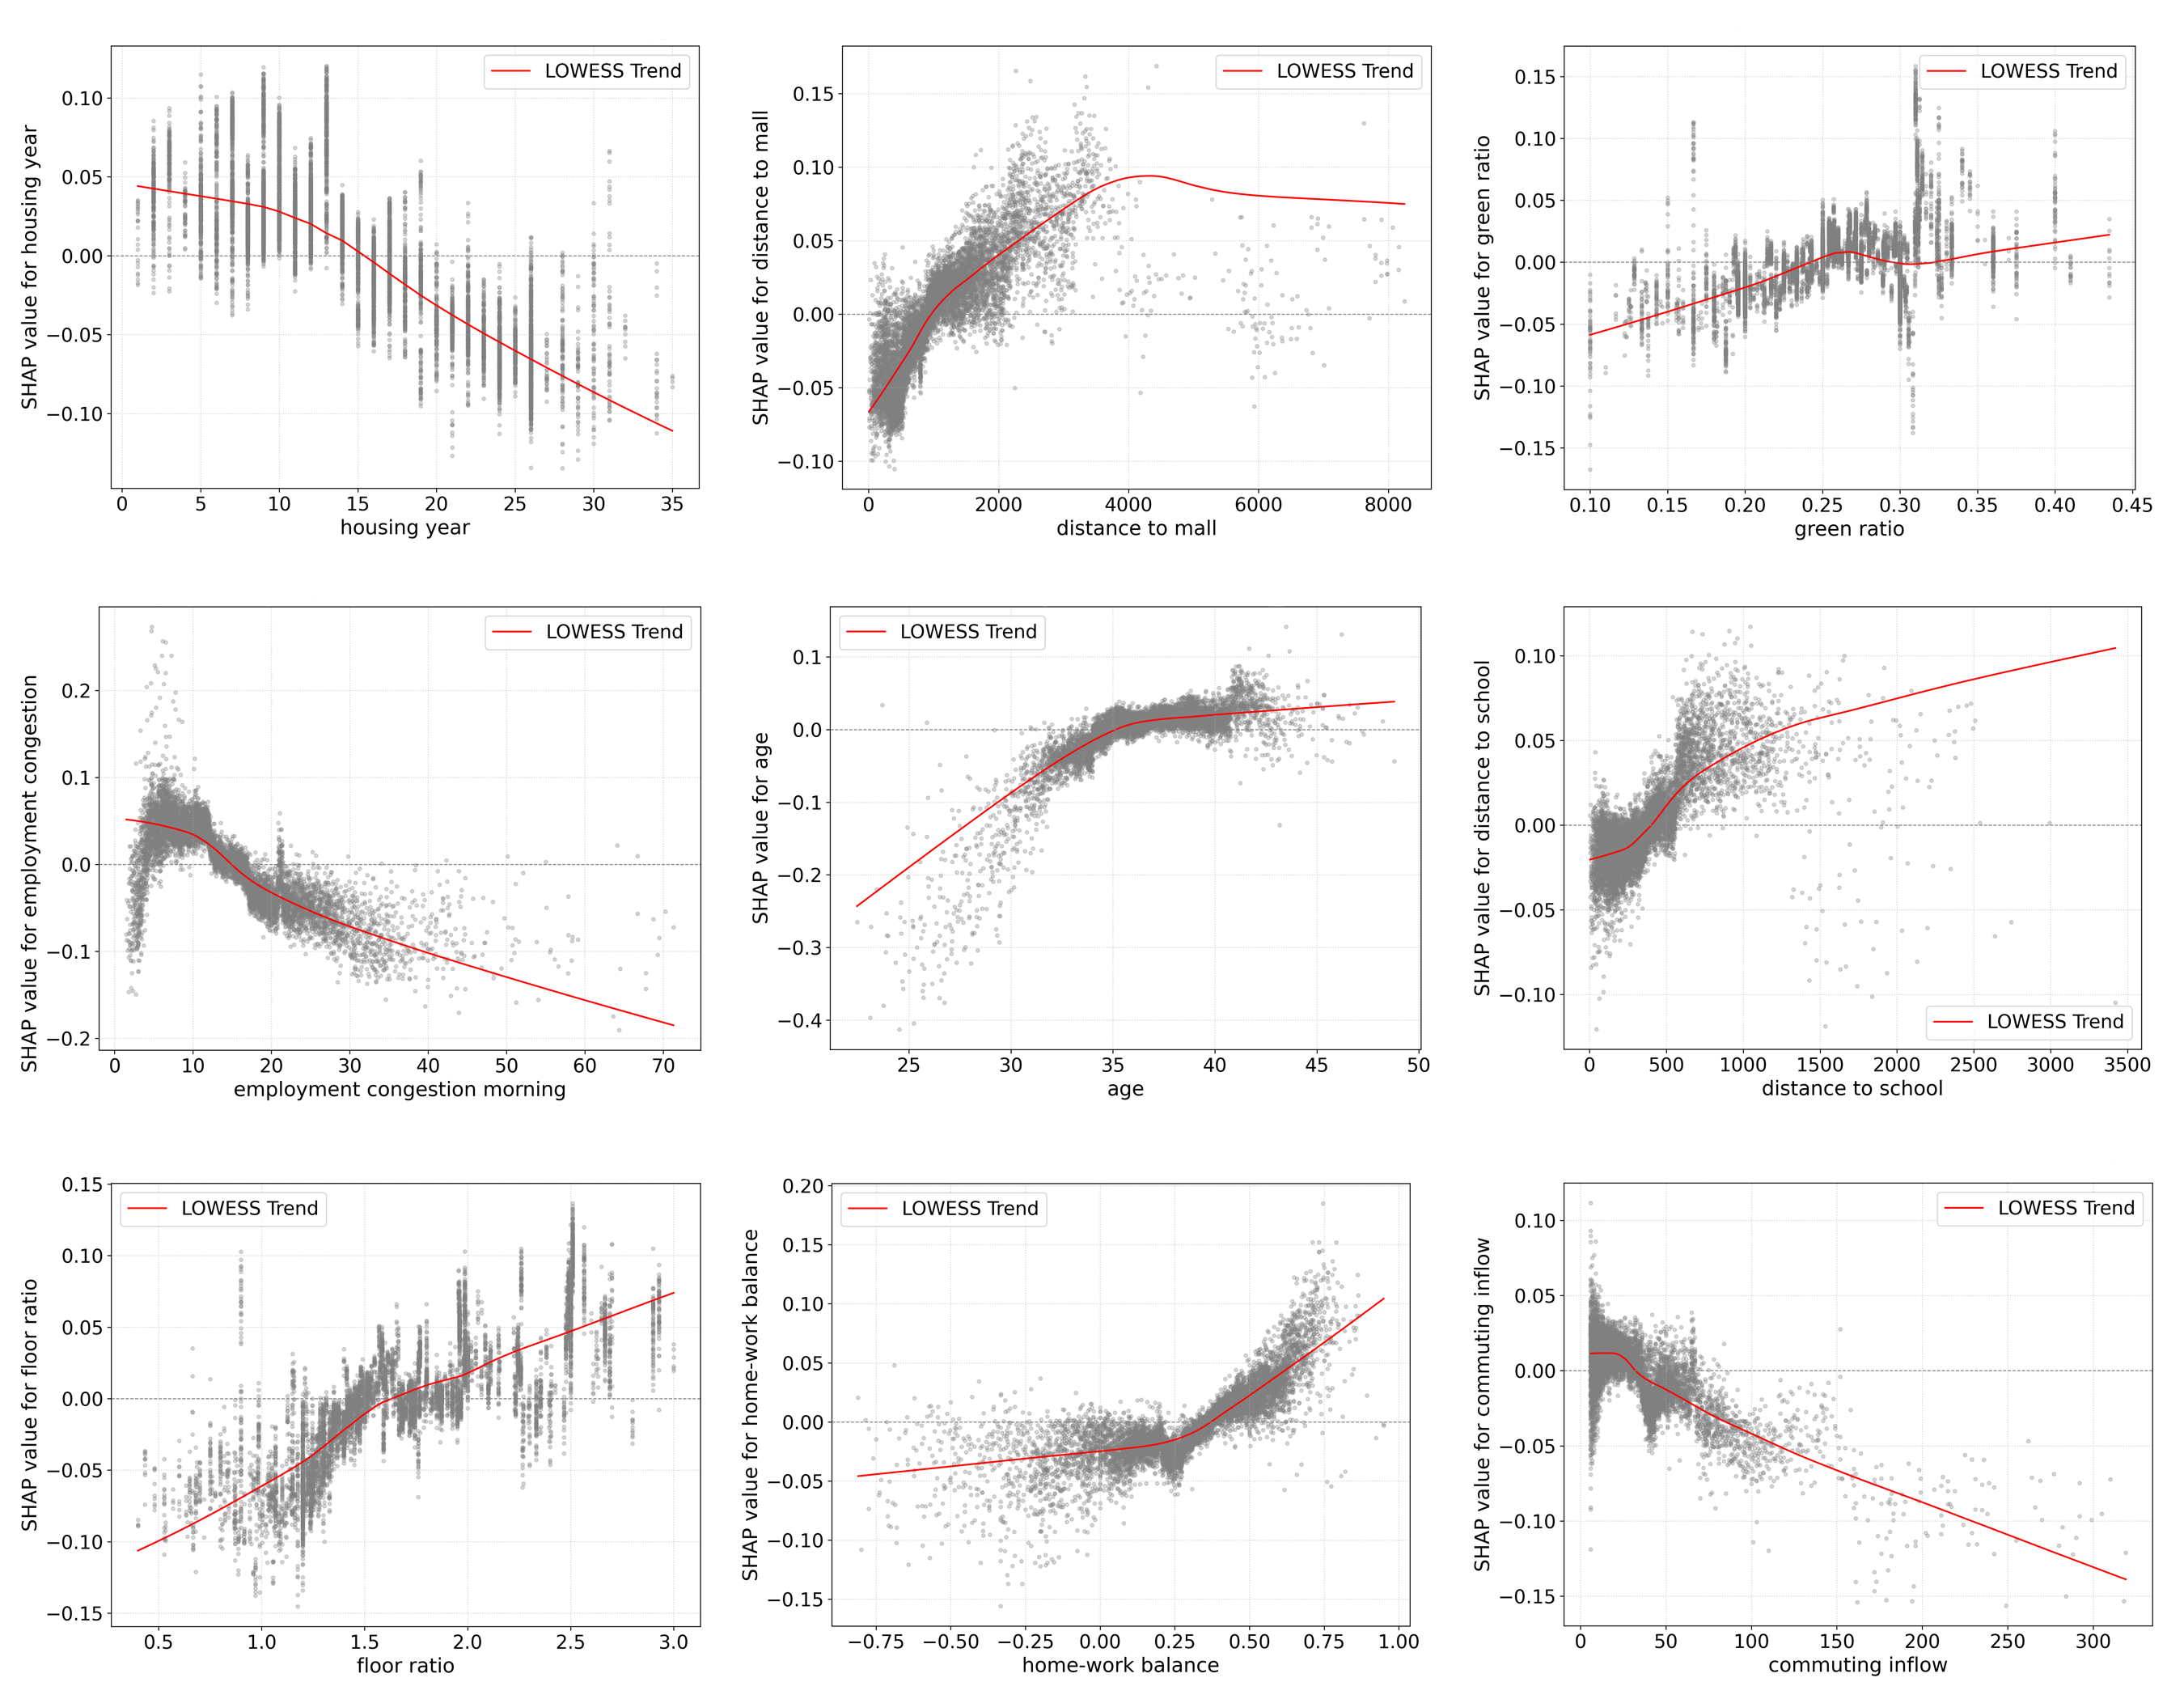

Supplement: Supplementary file 1 [file 278865a95ea048a1d8c6d669.docx]
